1 **Taxonomical and functional diversity of *Saprolegniales* in Anzali lagoon, Iran**

2 Hossein Masigol<sup>1,2</sup>, Seyed Akbar Khodaparast<sup>1</sup>, Reza Mostowfizadeh-Ghalamfarsa<sup>3</sup>, Keilor Rojas-  
3 Jimenez<sup>4</sup>, Jason Nicholas Woodhouse<sup>2</sup>, Darshan Neubauer<sup>5</sup> and Hans-Peter Grossart<sup>2,5\*</sup>

4  
5 <sup>1</sup>Department of Plant Protection, Faculty of Agricultural Sciences, University of Guilan, Rasht, Iran

6 <sup>2</sup>Department of Experimental Limnology, Leibniz-Institute of Freshwater Ecology and Inland  
7 Fisheries, Alte Fischerhuetten 2, D-16775 Stechlin, Germany

8 <sup>3</sup>Department of Plant Protection, School of Agriculture, Shiraz University, Shiraz, Iran

9 <sup>4</sup>Escuela de Biología, Universidad de Costa Rica, 11501 San Jose, Costa Rica

10 <sup>5</sup>Institute of Biochemistry and Biology, University of Potsdam, Potsdam, Germany

11 \*corresponding author (Email: [hgrossart@igb-berlin.de](mailto:hgrossart@igb-berlin.de) Phone: +49 (0)33082 699 91)

12

13 **Abstract**

14 Studies on the diversity, distribution and ecological role of *Saprolegniales* (*Oomycota*) in freshwater  
15 ecosystems are currently receiving attention due to a greater understanding of their role in carbon  
16 cycling in various aquatic ecosystems. In this study, we characterized several *Saprolegniales* species  
17 isolated from Anzali lagoon, Gilan province, Iran, using morphological and molecular methods. Four  
18 species of *Saprolegnia* were identified, including *S. anisospora* and *S. diclina* as first reports for Iran.  
19 Evaluation of the ligno-, cellulo- and chitinolytic activities were also measured using plate assay  
20 methods. Most of the *Saprolegniales* isolates were obtained in autumn and nearly 50% of the strains  
21 showed chitinolytic and cellulolytic activities. However, only a few *Saprolegniales* strains showed  
22 lignolytic activities. This study has important implications for better understanding the ecological  
23 niche of oomycetes, and to differentiate them from morphologically similar but functional different  
24 aquatic fungi in freshwater ecosystems.

25

26 **Key words** – *Achlya*, *Saprolegnia*, aquatic ecosystems, carbon cycling, polymer degradation,  
27 *Saprolegniaceae*

28

29 **Introduction**

30 *Saprolegniales*, as a monophyletic order, belong to the phylum *Oomycota*. It includes biflagellate  
31 heterotrophic microorganisms that have eucarpic mycelial and coenocytic thalli of unlimited growth.  
32 They produce asexual (sporangia) and sexual (gametangia) structures delimited by septa.  
33 *Saprolegniales* are mainly predominantly freshwater saprophytes of plant and animal debris (Beakes  
34 and Sekimoto 2009). This order contains three families; *Achlyaceae* (four genera), *Saprolegniaceae*  
35 (11 genera) and *Verrucalvaceae* (7 genera) (Beakes et al. 2014; Molloy et al. 2014; Beakes and  
36 Thines 2017; Rocha et al. 2018). Among these, *Achlya*, *Brevilegnia*, *Dictyuchus*, *Leptolegnia*,  
37 *Plectospira*, *Saprolegnia* and *Thraustotheca* have been commonly reported to inhabit freshwater  
38 ecosystems (Czeczuga et al. 2005; Mousavi et al. 2009; Marano et al. 2011).  
39 *Saprolegniales* species have been recently receiving increased attention due to their wide distribution,  
40 ubiquitous occurrence (Liu and Volz 1976; Kiziewicz and Kurzątkowska 2004; Nascimento et al.  
41 2011), their devastating fish pathogenicity in aquaculture and fish farms and responsibility for  
42 massive decline of natural salmonid populations (Griffiths et al. 2003; Van West 2006; Romansic et  
43 al. 2009; Van Den Berg et al. 2013). Aside from their pathogenicity, many authors have also  
44 investigated relative frequencies of *Saprolegniales* throughout different seasons in relation to physico-  
45 chemical features of the respective freshwater ecosystems (El-Hissy and Khallil 1991; Czeczuga et al.  
46 2003; Paliwal et al. 2009). Although these oomycetes are generally isolated from plant debris, their  
47 involvement in organic matter degradation in freshwater ecosystems remains less clear.  
48 Species identification of *Saprolegniales* is largely based on morphological features (Coker 1923;  
49 Seymour 1970; Johnson et al. 2002). However, this identification is perplexing due to several reasons.  
50 First of all, in many cases, morphological and morphometric characters are vague and variable.  
51 Secondly, more determinative features like sexual structures are not always produced *in vitro*. Also,  
52 lack of type species and accurate description make it even harder to define specific species (Sandoval-  
53 Sierra et al. 2015, 2014). Recently, sequencing of the ribosomal internal transcribed spacer (ITS) has  
54 been applied to create a phylogenetic framework within which to address issues of morphological and  
55 taxonomic ambiguity (Steciow et al. 2014). Whether complementary molecular targets, in addition to

56 the *de facto* ITS region, would improve this approach or are even necessary is still open to debate  
57 (Robideau et al. 2011).

58 In this study, we investigated the diversity and seasonality of various strains of *Saprolegniales*  
59 isolated from Anzali lagoon, Iran. In total, we obtained 511 isolates from three locations during 2017  
60 and studied their seasonality. From these, 23 isolates were randomly selected representing different  
61 sampling time points and locations and identified using morphological and phylogenetic analyses. In  
62 addition to their taxonomy, we tested the hypothesis raised by Masigol et al. (2019) that fungi and  
63 *Saprolegniales* differ in their affinity for polymeric dissolved organic matter (DOM) and  
64 consequently in their involvement in aquatic DOM degradation and cycling. To this, we evaluated the  
65 ligno-, cellulo- and chitinolytic activities of the selected strains. Our results have important  
66 implications for understanding the different roles of fungi and *Saprolegniales* in aquatic ecosystems.

## 67 **Materials & Methods**

### 68 **Sampling site**

69 Anzali lagoon is situated at the Caspian Sea near Bandar-e Anzali, in the northern Iranian province of  
70 Gilan. The lagoon divides Bandar-e Anzali into two parts, and is home to both the Selke Wildlife  
71 Refuge and the Siahkesheem Marsh. Three sampling sites as representatives of the main habitats in  
72 Anzali lagoon were selected: 1) river entrance, 2) shallow water habitat and 3) urban habitat (Fig. 1).

### 73 **Seasonal distribution of *Saprolegniales* and isolation**

74 Throughout 2017, 511 *Saprolegniales* isolates were isolated using the methods described earlier by  
75 Coker (1923) and Seymour (1970). In brief, samples of decaying leaves of the dominant local  
76 vegetation collected from the three sampling locations were brought to the mycology laboratory of the  
77 University of Guilan in separate sterile polyethylene bags. Leaves were cut into approximately ten  
78 equal pieces (0.5×0.5 cm). After washing with distilled water, they were incubated at 20-25°C in  
79 sterilized plates containing 10 mL sterile distilled water with 20 sterilized hemp seed halves  
80 (*Cannabis sativa* L.) (Middleton 1943). Temperature and pH of surface water were continuously  
81 recorded immediately after collecting decaying leaves. Three replicates were considered for each  
82 location. The average number of colonized hemp seed halves from 10 Petri dishes was used to  
83 estimate the abundance of *Saprolegniales* throughout the year. The presence of *Saprolegniales* was

84 confirmed by observing at least one of the general features of oomycetes such as oogonia, sporangia,  
85 large and aseptate mycelia and motile zoospores.

86 After three to five days, a piece of mycelia from the colonized hemp seed halves was transferred to a  
87 fresh CMA-PARP medium (CMA-PARP; 40 g/L ground corn meal, 0.5 g/L ampicillin, 0.01  
88 rifampicin, 0.2 g/L Delvocidsalt and 0.1 g/L Pentachloronitrobenzene (PCNB), 15 g/L agar)  
89 (Kannwischer and Mitchell 1981). This step was repeated three to five times to achieve bacterial free  
90 (axenic) cultures. A single hypha was transferred to cornmeal agar (CMA; 40 g/L ground corn meal,  
91 15 g/L agar) (Seymour and Fuller 1987). The hyphal-tip technique was conducted three to five times  
92 to obtain a pure culture in CMA. The specimens of these new strains were then deposited in the  
93 Fungal Herbarium of the Iranian Research Institute of Plant Protection, Iran.

#### 94 **Characterization of morphological features**

95 Asexual and sexual structures of isolates were characterized and measured in liquid (water) cultures  
96 (n=30). To investigate strains failing to produce any sexual structures, several treatments were used.  
97 The nutrition treatments included (1) reciprocal culturing of all strains with one another and  
98 *Trichoderma* sp. (Brasier et al. 1978) on CMA, (2) hemp seed agar (HSA; 60 g/L ground hemp seeds,  
99 15 g/L agar ) (Hendrix 1964), (3) soybean agar (SA; 100g/L ground soybean seeds, 15 g/L agar)  
100 (Savage et al. 1968), (4) rape seed extract agar (REA; 100g/L ground rape seeds, 15 g/L) (Satour  
101 1967), (5) carrot juice agar (CJA; 250 g/L boiled carrot extract, 20 g/L agar) (Ershad 1971), (6)  
102 mPmTG (2, 0.4, 0.4 and 12 g/L glucose, tryptone, peptonized milk and agar, respectively) (Moreau  
103 and Moreau 1936b), (7) immersing colonized CMA in glycerin (4%) (Moreau and Moreau 1936a) and  
104 (8) culturing the isolates in Petri dishes containing 10 boiled hemp seeds in distilled lake water and  
105 distilled water (50/50). The temperature treatments also included culturing the isolates in 5, 10, 15,  
106 20, and 25°C in Petri dishes containing ten boiled hemp seeds in distilled lake water and distilled  
107 water (50/50).

#### 108 **DNA extraction and PCR**

109 The DNA extraction was conducted based on a slightly modified protocol of Montero-Pau et al.  
110 (2008). Briefly, 100 µL of alkaline lysis buffer (25 mM NaOH, 0.2 mM disodium EDTA, pH 8.0)  
111 was aliquoted into 1.5 mL tubes. Malt extract broth (MEB; 17 g/L malt extract) (Galloway and

112 Burgess 1937) was used for growth of isolates. Mycelial mass was then transferred to the tube and  
113 centrifuged for 30 minutes at 9000 rpm. The tube was incubated at 95°C for 30 minutes and then  
114 cooled on ice for five minutes. Finally, 100 µL of neutralizing solution (40 mM Tris-HCl, pH 5.0)  
115 was added to the tubes. The final solution was vortexed and kept at -20°C. Nuclear ITS region was  
116 amplified in a Flexible PCR Thermocycler (Analytikjena, Germany) using ITS1/ITS4 (White et al.  
117 1990) primers. Thermocycler program for amplification of the ITS region was: 94°C for 2 min for  
118 initial denaturation followed by 32 cycles of 94°C for 15 s, 53°C for 15 s, 72°C for 30 s, and a final  
119 extension at 72°C for 5 min (White et al. 1990). The resulting sequences were quality controlled using  
120 the Bioedit software (Hall et al. 2011) and submitted to GenBank (National Center for Biotechnology  
121 Information; <http://www.ncbi.nlm.nih.gov>) database (for accession numbers see Table1).

## 122 **Phylogenetic analysis**

123 Molecular taxonomical assignment of the isolates was performed by comparing sequences against the  
124 NCBI's GenBank sequence database using the BLASTN search method. We selected and downloaded  
125 sequences of cultured isolates for performing phylogenetic analyses. The ITS sequences were aligned  
126 by the ClustalW algorithm (Thompson et al. 1994) and the phylogenetic tree was obtained using  
127 MEGA version 7 by the Maximum Likelihood (ML) method based on the Tamura-Nei model (Kumar  
128 et al. 2016).

## 129 **Screening for lignolytic, cellulolytic and chitinolytic activities**

### 130 **- *Lignolytic assay***

131 Mycelia from the edge of 7-15 days cultures were transferred into 6-well plates containing the  
132 cultivation medium proposed by Rojas-Jimenez et al. (2017) (0.94 g KH<sub>2</sub>PO<sub>4</sub>, 1.9 g K<sub>2</sub>HPO<sub>4</sub>, 1.6 g  
133 KCl, 1.43 g NaCl, 0.15 g NH<sub>4</sub>Cl, 0.037 g MgSO<sub>4</sub>, 0.1 g yeast extract, 10 g malt extract, 15 g/L agar,  
134 pH 7.0) and mPmTG agar medium amended with one of the following substrates: (1) 0.1% wt/vol  
135 2,20-Azino-bis 3-ethylbenzothiazoline-6-sulfonic acid diammonium salt (ABTS), (2) 0.02 and  
136 0.005% wt/vol Bromocresol Green (BG), (3) 0.02 and 0.005% wt/vol Congo Red (CR), (4) 0.02 and  
137 0.005% wt/vol Malachite Green (MG) (5) 0.02 and 0.005% wt/vol Phenol Red (PhR) (6) 0.02 and  
138 0.005% wt/vol PolyR-478 (PR) (pH 5 + 7) (7) 0.02 and 0.005% wt/vol Remazol Brilliant Blue  
139 (RBBR), and (8) 0.02 and 0.005% wt/vol Toluidine Blue (TB) (Pointing 1999; Swamy and Ramsay

140 1999; Moreira et al. 2000; Novotny et al. 2001; Gill et al. 2002; Rojas-Jimenez et al. 2017). The  
141 concentration of different dyes in previous experiments is highly variable. Therefore, two different  
142 concentrations were used to ensure that the applied concentration does not impact on the growth or  
143 the enzymatic activities of the tested strains. The capacity of each strain to produce lignolytic activity  
144 was determined by decolorization of the aforementioned substrates in the area around the mycelia or  
145 as a colour change of the media after three weeks. We evaluated 1-33, 33-66, and 66-100%  
146 decolorization of the medium in the Petri dishes as weak, medium, and strong activity, respectively.

#### 147 - *Cellulolytic assay*

148 The same media as used for evaluation of lignolytic activities were amended with the following  
149 enzymatic carbon sources to investigate cellulolytic and pectolytic activities: (9) 7.5 g  
150 carboxymethylcellulose (CMC), (10) 7.5 g Avicel (AVL) and (11) 5g D-cellobiose (DCB) (Wood and  
151 Bhat 1988; Pointing 1999; Yoon et al. 2007; Jo et al. 2010). After three weeks of incubation, Congo  
152 Red (1 mg ml<sup>-1</sup>) was amended to the medium and incubated at room temperature for 15 min.  
153 Subsequently, the medium was rinsed with distilled water, and 30 mL of 1 M NaCl added.  
154 Degradation of CMC, Avicel, and D-cellobiose was confirmed by a transparent appearance of the  
155 medium (and mycelia) (Teather and Wood 1982; Pointing 1999).

#### 156 - *Chitinolytic assay*

157 The method proposed by Agrawal and Kotasthane (2012) was used to evaluate the chitinolytic  
158 properties of the isolated strains. Crab shell flakes were ground in a mortar and sieved through the top  
159 piece of a 130 mm two-piece polypropylene Buchner filter. Twenty grams of the sieved crab shell  
160 flakes were then treated with 150 mL of ~12M concentrated HCl which was added gently and  
161 continuously stirred for 45 minutes under a chemical fume hood. The final mixture was passed  
162 through eight layers of cheese cloth to remove large chitin chunks. The product was treated with two  
163 litres of cold distilled water and incubated overnight under static conditions at 4°C. Sufficient amount  
164 of tap water was then passed through the product until the pH of the product reached 7.0. The final  
165 product was squeezed between coffee paper and then sterilized by autoclaving at standard temperature  
166 and pressure (STP) (15 psi, 20 minutes, 121°C) (Murthy and Bleakley 2012). The chitinase detection  
167 medium consisted of a basal medium comprising (per litre) 0.3 g of MgSO<sub>4</sub>.7H<sub>2</sub>O, 3.0 g of

168 (NH<sub>4</sub>)<sub>2</sub>SO<sub>4</sub>, 2.0 g of KH<sub>2</sub>PO<sub>4</sub>, 1.0 g of citric acid monohydrate, 15 g of agar, 200 μL of Tween-80, 4.5  
169 g of colloidal chitin (CC) and 0.15 g of Bromocresol Purple; the pH was adjusted to 4.7, and the  
170 neutralized medium autoclaved.

171 For each isolate, the experimental procedures mentioned above were repeated twice with three  
172 replicates each. When a positive result was observed, this was confirmed in a third experiment using  
173 tissue culture plates (TPP®) with the medium described above. We observed no conflicting results  
174 from any of the three experimental instances, for each of the tested isolates and substrates. Strains  
175 already tested by Rojas-Jimenez et al. (2017) were considered as positive controls.

### 176 **Statistical analyses**

177 We assessed whether there was a significant impact of month or broadly season at each of the three  
178 locations on the frequency of *Saprolegniales* colonisation of hemp leaves, using a two-way ANOVA.  
179 The relative contribution of temperature and pH to any spatio-temporal trends were assessed using  
180 Spearman's Rank correlations. A propensity of individual genera or taxa to metabolise individual  
181 substrates was assessed using a two-way ANOVA. All statistical analyses were conducted using  
182 GraphPad Prism version 8.1. (GraphPad Software, CA, USA).

### 183 **Results**

#### 184 **Relative abundance of *Saprolegniales* isolates**

185 From all the oomycetes isolated from the three locations sampled along the year, 511 out of 720  
186 (~71%) were assigned to the order *Saprolegniales*. The relative abundance of *Saprolegniales* was  
187 higher at cold temperatures (autumn, winter and spring seasons) than in summer. The highest  
188 temperatures were recorded in Jul. 23th-Aug. 22th (in average~33°C) and the lowest in Jun. 21th-Feb.  
189 19th (in average~3°C). The number of isolates from river entrance, shallow lake and urban habitats  
190 was negatively correlated with temperature ( $R^2 = 0.7233, 0.5047$  and  $0.7623$ , respectively). However,  
191 pH was constant and no correlation was observed for river entrance, shallow lake and urban habitats  
192 ( $R^2 = 2E-05, 0.0037$  and  $0.0684$ , respectively). Of the 720 hemp seeds, only 209 were not colonized  
193 by *Saprolegniales* isolates (~29%). These were either colonized by other microorganisms such as  
194 fungi and protists, or remained intact. Co-colonization of *Saprolegniales* isolates and other unwanted  
195 subjects or organisms was not counted as a positive result (Table 2).

196 **Morphological and molecular identification**

197 Of the selected isolates, 19 belonged to the genus *Saprolegnia* and four to the genus *Achlya*. Four  
198 isolates of *Achlya* failed to produce sexual structures under any circumstances and thus were  
199 considered as *Achlya* spp. (Isolates JT2W9-1, F962-15, O962-13 and O963-13). Morphology-based  
200 taxonomy was confirmed by phylogenetic analysis of ITS sequences of nrDNA inferred from  
201 maximum likelihood method.

202 *Saprolegnia anisospora* (Pringsheim) de Bary Bot. Zeitung (Berlin) 41:56. 1883 (Fig. 2a-c)

203 Mycelium dense; main hyphae branched, hyaline to dark, with 16–46  $\mu\text{m}$  (average 26  $\mu\text{m}$ ) width.  
204 Sporangia very abundant, mainly fusiform, straight, sometimes curved, renewed in cymose fashion,  
205 80–405  $\times$  18–50  $\mu\text{m}$  (average 220 $\times$ 26  $\mu\text{m}$ ). They discharged spores and behaved as saprolegnoids.  
206 Cysts 9–13  $\mu\text{m}$  in diameter (average 10  $\mu\text{m}$ ). Gemmae absent. Oogonia terminal, always spherical,  
207 always immature, 78–107  $\mu\text{m}$  in diameter. Oogonial wall smooth. Oogonial stalks 1-3 times the  
208 diameter of oogonium, slender, slightly irregular and unbranched. Oospores never produced. No  
209 specific pattern was observed for any of our strains on CMA.

210 **Material examined:** strains MDL5-1 and MDL14-1, on rotten leaves, Anzali lagoon, Anzali, Guilan,  
211 Iran, 10-8-2017, H. Masigol; GenBank Acc. No: ITS – MK911009 and MK911010.

212 *Saprolegnia diclina* Humphrey Trans. Amer. Phil. Soc. (N.S.) 17:109, pl. 17 (Fig. 2d-f)

213 Mycelium sparingly to moderately branched, 17–42  $\mu\text{m}$  (average 35  $\mu\text{m}$ ) in width. Sporangia  
214 abundant, cylindrical, always straight, renewed internally, 120–976  $\times$  18–69  $\mu\text{m}$  (average 460 $\times$ 52  $\mu\text{m}$ ).  
215 They discharged spores and behaved as saprolegnoids. Cysts 8–11  $\mu\text{m}$  in diameter (average 9  $\mu\text{m}$ ).  
216 Gemmae spherical, 66–110  $\mu\text{m}$  in diameter, terminal, sometimes catenulate. Oogonia terminal,  
217 spherical, obpyriform, 75–105  $\mu\text{m}$  in diameter. Oogonial wall smooth. Oogonial stalk 1–3 times the  
218 diameter of the oogonium, slender and unbranched. Oospores centric, spherical, 6–26 per oogonium  
219 and 14–28  $\mu\text{m}$  in diameter. Antheridia abundant, diclinous and androgynous. No specific pattern  
220 observed for any of our isolates on CMA.

221 **Material examined:** isolates JSL25-2, FSL9, JSL24-3, JSW5-1, JSW17 and FSW19, on rotten  
222 leaves, Anzali lagoon, Anzali, Guilan, Iran, 10-8-2017, H. Masigol; GenBank Acc. No: ITS –  
223 MK911019, MK911018, MK911016, MK911015, MK911014 and MK911013.



224 *Saprolegnia ferax* (Grith.) Thuret Ann. Sci. Nat. Bot. 14:229 et spp. pl. 22. 1850 (Fig. 2g-i)  
225 Mycelium dense; main hyphae highly branched, hyaline to dark, 15–62  $\mu\text{m}$  (average 44  $\mu\text{m}$ ) in width.  
226 Sporangia abundant, cylindrical, rarely fusiform, always straight, renewed sympodially, 60–490  $\times$  22–  
227 78  $\mu\text{m}$  (average 352 $\times$ 51  $\mu\text{m}$ ). They discharged spores and behaved as saprolegnoids. Cysts 7–11  $\mu\text{m}$   
228 in diameter (average 10  $\mu\text{m}$ ). Gemmae were overabundant, extremely irregular, terminal and  
229 intercalary. Oogonia terminal, sometimes intercalary, spherical, obpyriform, spherical, 76–99  $\mu\text{m}$  in  
230 diameter and sometimes with irregular shapes. Oogonial smooth. Oogonial stalk 1–3 times the  
231 oogonium diameter, slender and unbranched. Oospores centric, spherical, 2–48 per oogonium, 15–63  
232  $\mu\text{m}$  in diameter. Antheridia very rare, when present declinous, 1–5 per oogonia. No specific pattern  
233 observed for any of isolates on CMA.

234 **Material examined:** isolates JT1L3, JT1W7, JT117, JT1L2, JT1W3-1, JTL6-1 and JT2W6-1, on  
235 rotten leaves, Anzali lagoon, Anzali, Guilan, Iran, 10-8-2017, H. Masigol; GenBank Acc. No: ITS –  
236 MK911003, MK911002, MK911004, MK911005, MK911006, MK911007 and MK911008.

237 *Saprolegnia parasitica* Coker *emend.* Kanouse, Mycologia 24:447, pls. 13. 1932 (Fig. 2j and l-m)  
238 Mycelium moderately branched, with 18–56  $\mu\text{m}$  (average 39  $\mu\text{m}$ ) width. Sporangia cylindrical,  
239 renewed internally, 150–460  $\times$  20–66  $\mu\text{m}$  (average 325 $\times$ 52  $\mu\text{m}$ ). They discharged spores and behaved  
240 as saprolegnoid. Cysts 10–12  $\mu\text{m}$  in diameter (average 11  $\mu\text{m}$ ). Gemmae absent in water cultures,  
241 when present they were terminal, spherical and single. Oogonia mainly lateral, sometimes terminal,  
242 86–110  $\mu\text{m}$  in diameter, very rarely catenulate. Oogonial wall smooth. Oogonial stalk very short, 0.4-  
243 0.9 times the oogonium diameter, slender, unbranched and sometimes absent. Oospores centric,  
244 spherical, 8–32 per oogonium and 12–29  $\mu\text{m}$  in diameter. Antheridia declinous. No specific pattern  
245 observed for any of our isolates on CMA.

246 **Material examined:** isolates DSL1 and FSL17, on rotten leaves, Anzali lagoon, Anzali, Guilan, Iran,  
247 10-8-2017, H. Masigol; GenBank Acc. No: ITS – MK911020 and MK911017.

#### 248 **Phylogenetic analyses**

249 The phylogenetic classification of ITS sequences (694 bp) of the different genera belonging to  
250 *Saprolegniaceae* (*Saprolegniales*, *Oomycota*), inferred from both maximum likelihood method was  
251 consistent with the morphology-based taxonomy. Moreover, we found for most morphological

252 identified species some reliable sequences with high similarity (99-100%), so that these sequences  
253 clustered with our identified species in the same clade (Fig. 3).

#### 254 **Screening for lignolytic, cellulolytic, pectolytic and chitinolytic activities**

255 Of all tested isolates, 61% showed chitinolytic activities. In addition, 52, 43, and 48% of all tested  
256 isolates showed cellulolytic activities in the medium amended with avicel (AVL),  
257 carboxymethylcellulose (CMC) and D-cellobiose (DCB), respectively. In contrast, no significant  
258 lignolytic activities were observed. Decolorization of dyes was detected only in the medium amended  
259 with Bromocresol Green (BG) and Toluidine Blue (TB) (39 and 8% of isolates, respectively). In some  
260 cases, isolates failed to grow, especially in the medium amended with Phenol Red (phR). Also, in  
261 media amended with Congo Red, adsorption by mycelia was observed. Thus, it was not considered as  
262 a proof for lignolytic activity (table 3).

#### 263 **Discussion**

264 With this study we sought to evaluate both the spatio-temporal occurrence of *Saprolegniales* species  
265 within the brackish Anzali lagoon and to describe their morphological, phylogenetic, and  
266 physiological diversity. Previously, *Dictyuchus* Leitgeb genus (*Stramenopila*, *Oomycetes*) had been  
267 reported from Anzali lagoon (Masigol et al. 2018). We did not observe an influence of sampling site  
268 on the isolation of the taxa, although that isolation rate was slightly lower at the river mouth site in  
269 summer and thus may reflect some local seasonal effects. Generally, we observed a much lower  
270 abundance of *Saprolegniales* isolates in summer, when both precipitation and terrestrial input was  
271 lowest. This is in agreement with the 25 existing case studies (e.g., Czczuga et al. 2003; Paliwal and  
272 Sati 2009) which show a similar pattern and variation in abundance. High temperature periods are the  
273 least favourable for *Saprolegniales* (Fig. 4), although this should be considered alongside other  
274 potentially covering aspects. For instance, the diversity of *Saprolegniales* isolates has been correlated  
275 with water hardness (Czczuga et al. 2003) as well as  $Mg^{2+}$ ,  $SO_4^{2-}$  and  $Ca^{2+}$  concentrations (Czczuga  
276 et al. 2002). We should also consider that the highest impact of pollution in Anzali lagoon occurs  
277 during the summer season (Fallah and Zamani-Ahmadmahmoodi 2017) associated with a high  
278 discharge of agricultural waste and increase in fish breeding activities. Khatib and Khodaparast

279 (2010) noted that the higher water temperature and declining water volume created ideal conditions  
280 for bacteria in the summer, which might compete with oomycetes for organic matter.

281 Previous attempts to fully elucidate the impact of anthropogenic pollution on the microbial ecology of  
282 Anzali Lagoon have largely overlooked the role of fungi and oomycetes. Understandably, integration  
283 of mycological approaches into aquatic ecology is difficult, with vague morphological features  
284 contributing to the inability to distinguish between species *in situ*. This is particularly true for  
285 *Saprolegniales* taxa for which species identification is complex and often lacks a conclusive and  
286 consistent morphological form (Hulvey et al. 2007; Steciow et al. 2014). With this study, by assessing  
287 the number of isolated colonies we were able to better assess the occurrence and distribution of these  
288 organisms in the environment. However, this approach is still limited in that it is both time-consuming  
289 and not all *Saprolegniales* may be readily cultured.

290 Using a combination of morphological and molecular approaches we were able to confirm the  
291 occurrence of four *Saprolegnia* spp., of which *Saprolegnia anisospora* and *S. diclina* have never been  
292 reported in Iran. For the most part, *Saprolegnia* spp. could be differentiated using exclusively  
293 molecular approaches. *Saprolegnia anisospora*, confirmed by molecular analyses, was consistent with  
294 the morphological description albeit lacking the typical production of oospores in culture.

295 Differentiation of *S. diclina* and *S. parasitica* and *S. aenigmatica* was only possible using molecular  
296 approaches due to a high number of shared morphological features (Johnson et al. 2002, Diéguez-  
297 Uribeondo et al. 2007, Sandoval-Sierra and Diéguez-Uribeond 2015). Phylogenetic analysis generally  
298 suggested that sequences of *Achlya* spp. were similar to sequences of *Achlya bisexualis*, *A. flagellata*  
299 and *A. orion*. Clear approaches toward species identification are critical since many species such as *S.*  
300 *diclina* (Hussein et al. 2013), *S. ferax* (Cao et al. 2012) and *S. parasitica* (Griffiths et al. 2003) are  
301 considered pathogens and may devastate fish and amphibians' populations.

302 As our awareness of inland waters increases over time, we are gaining an increased appreciation for  
303 their role as key players in the global carbon cycle (Tranvik et al. 2018). Inland waters, through the  
304 activity of aquatic bacteria and fungi, are involved in remineralising large proportions of terrestrial  
305 organic matter into greenhouse gases. In this context, understanding the relative contribution of  
306 bacteria and fungi, of which fungi are better equipped to break down both dissolved and particulate

307 polymeric organic matter using diverse array of extracellular enzymes, is critical (Grinhut et al. 2011;  
308 Zahmatkesh et al. 2016; Collado 2018). However, although aquatic *Saprolegniales* are generally  
309 isolated from floated plant and animal debris, their involvement in organic matter degradation in  
310 various freshwater ecosystems has been largely ignored. In their study on seven *Saprolegniales*  
311 isolates from skin of living crayfish, Unestam (1966) showed a lack of cellulolytic activity by  
312 *Aphanomyces* spp., *Pythium* spp. and *Saprolegnia* spp. interestingly, all isolates exhibited chitinolytic  
313 activity (Unestam 1966; Nyhlen and Unestam 1975). In contrast, Thompson and Dix (1985) showed  
314 moderate to strong cellulolytic activity tested in 27 *Saprolegniales* taxa including *Achlya* spp. and  
315 *Saprolegnia* spp.. Whether the capacity of oomycetes to utilize more complex polymers, including  
316 lignin, remains unclear. Although our strains can fairly represent *Achlya* and *Saprolegnia*, isolation of  
317 less common genera will be necessary to have a better understanding of their enzymatic affinities.  
318 In this study, capacity to degrade lignin was not evident with none of the isolates exhibiting laccase  
319 activity, and fewer than 25% of the isolates exhibiting any peroxidase activity (table 3). This agrees  
320 with a previous study where the potential for lignin degradation amongst *Dictyuchus* spp. and *Achlya*  
321 spp. isolates was essentially absent when compared to filamentous fungi isolated from the same  
322 environment (Masigol et al. 2019) and elsewhere (Abdel-Raheem and Shearer 2002; Junghanns et al.  
323 2008; Simonis et al. 2008). The lack of any significant lignolytic activity amongst the aquatic  
324 *Saprolegniales* indicates that biopolymer degradation is specific and may be limited to just chitin and  
325 cellulose, in contrast with the broader specificity of fungi. Saprophytic *Saprolegniales* exhibiting  
326 chitinolytic and cellulolytic activity, as indicated by our study, may be more critical in the  
327 remineralisation of chitin-based particulate organic matter. This is supported by a close association of  
328 *Saprolegniales* with crustacean carapaces (Czeczuga et al. 1999; Czeczuga et al. 2002), feathers of  
329 wild and domestic bird species (Czeczuga et al. 2004), the benthic amphipod *Diporeia* spp.  
330 (Kiziewicz and Nalepa 2008) and the seeds of plants (Kiziewicz 2005) where chitin comprises a  
331 primary component of the biomass. Whilst the presence of an organism possessing chitinolytic  
332 enzymes on chitin rich substrates does not immediately prove its involvement in chitin processing, we  
333 feel it warrants additional investigation. In this study we isolated oomycetes directly from plant debris  
334 occurring in freshwater systems, despite their inability to utilise the predominantly lignin-based

335 substrate. Steinberg et al. (2003) and Meinelt et al. (2007) argue that plant-derived humic acids, which  
336 occur at high abundance at the terrestrial-aquatic interface, inhibit the growth of some oomycetes.  
337 Therefore, their ecological role in this niche remains uncertain, although we speculate that they may  
338 form, at minimal, a commensal relationship with filamentous fungi, to utilise both the labile (chitin,  
339 cellulose) and more refractory (lignin) components on this substrate (Lennon et al. 2013; Solomon et  
340 al. 2015).

341 In conclusion, it is important to complement traditional morphology-based taxonomy with molecular-  
342 based taxonomy but including several markers. It will be also essential to include other techniques  
343 such as metabarcoding to have a better impression of the relative abundance of this group respect  
344 other eukaryotes. To our knowledge, most of the studies performed in various freshwaters lack precise  
345 taxonomy and hence are greatly impacting ecological interpretations. We observed clear seasonal  
346 dynamics in the occurrence of *Saprolegniales* in Anzali lagoon with a decline in summer linked to  
347 both increased water temperature and high levels of anthropogenic pollution. We confirmed that  
348 *Saprolegniales* isolates lack the broad substrate specificity of fungi, rather exhibiting specific activity  
349 towards cellulose or chitin-based substrates. Whether predominantly lignin-based plant-derived  
350 substrates are an energy source, or simply a transport vector, for aquatic oomycetes remains unclear  
351 and should be further tested. Evaluating the fate of allochthonous carbon in aquatic and global C  
352 cycles should better consider the occurrence and impact of oomycetes, particularly for substrates  
353 where chitin is particularly dominant. We should better evaluate the interactions between oomycetes  
354 and fungi and bacteria both in competition for nutrients and carbon as well as for potential commensal  
355 and synergistic impacts on carbon cycling.

356

357

358

359

360

361

362

363

364

365 **References**

366 Abdel-Raheem A, Shearer C (2002) Extracellular enzyme production by freshwater ascomycetes.  
367 Fungal Divers. 11:1-19.

368 Agrawal T, Kotasthane AS (2012) Chitinolytic assay of indigenous Trichoderma isolates collected  
369 from different geographical locations of Chhattisgarh in Central India. SpringerPlus 1(1):73.

370 Beakes GW, Thines M (2017) Hyphochytriomycota and Oomycota. In: Archibald J, Simpson A,  
371 Slamovits C (eds) Handbook of the Protists. Springer International Publishing, pp 435-505.

372 Beakes GW, Honda D, Thines M (2014) Systematics of the Straminipila: Labyrinthulomycota,  
373 Hyphochytriomycota, and Oomycota. In: The Mycota VII part A—Systematics and evolution.  
374 Springer, Berlin, Heidelberg, pp 39-97.

375 Beakes GW, Sekimoto S (2009) The evolutionary phylogeny of oomycetes—insights gained from  
376 studies of holocarpic parasites of algae and invertebrates. In: Lamour K, Kamoun S (eds)  
377 Oomycete genetics and genomics: diversity, interactions, and research tools. John Wiley &  
378 Sons, Inc., United States, pp 1-24.

379 Brasier CM (1978) Stimulation of oospore formation in *Phytophthora* by antagonistic species of  
380 Trichoderma and its ecological implications. Ann. Appl. Biol. 89(1):135-139.

381 Cao H, Zheng W, Xu J, Ou R, He S, Yang X (2012) Identification of an isolate of *Saprolegnia ferax*  
382 as the causal agent of saprolegniosis of Yellow catfish (*Pelteobagrus fulvidraco*) eggs. Vet.  
383 Res. Commun. 36(4):239-244.

384 Coker WC (1923) The Saprolegniaceae with Notes on Other Water Molds. University of North  
385 Caroline Press, Chapel Hill, North Carolina 201.

386 Collado S, Oulego P, Suárez-Iglesias O, Díaz M (2018) Biodegradation of dissolved humic  
387 substances by fungi. Appl. Microbiol. Biotechnol. 102(8):3497-3511.

388 Czczuga B, Godlewska A, Kiziewicz B (2004) Aquatic fungi growing on feathers of wild and  
389 domestic bird species in limnologically different water bodies. Pol. J. Environ. Stud.  
390 13(1):21-31.

- 391 Czczuga B, Kiziewicz B, Mazalska B (2003) Further Studies on Aquatic Fungi in the River Biebrza  
392 within Biebrza National Park. Pol. J. Environ. Stud. 12(5):531-543.
- 393 Czczuga B, Kozłowska M, Godlewska A (2002) Zoosporic aquatic fungi growing on dead specimens  
394 of 29 freshwater crustacean species. Limnologica 32(2):180-193.
- 395 Czczuga B, Kozłowska M, Godlewska A (1999) Zoosporic fungus species growing on dead benthos  
396 crustaceans. Pol. J. Environ. Stud. 8(6):377-382.
- 397 Czczuga B, Mazalska B, Godlewska A, Muszyńska E (2005) Aquatic fungi growing on dead  
398 fragments of submerged plants. Limnologica 35:283-297.
- 399 Diéguez-Uribeondo J, Fregeneda-Grandes JM, Cerenius L, Pérez-Iniesta E, Aller-Gancedo JM,  
400 Tellería MT, Söderhäll K, Martín MP (2007) Re-evaluation of the enigmatic species complex  
401 *Saprolegnia diclina*–*Saprolegnia parasitica* based on morphological, physiological and  
402 molecular data. Fungal Genet. Biol. 44(7):585-601.
- 403 El-Hissy FT, Khallil ARM (1991) Distribution and seasonal occurrence of aquatic Phycomycetes in  
404 water and submerged mud in El-Ibrahimia canal (Upper Egypt). Journal of Islamic Academy  
405 of Sciences 4(4): 311-316.
- 406 Ershad D (1971) Beitrag zur Kenntnis der Phytophthora-Arten in Iran und ihrer phytopathologischen  
407 Bedeutung. Mitteilungen aus der Biologischen Bundesanstalt für Land-und Forstwirtschaft  
408 Berlin-Dahlem 140:60-64.
- 409 Fallah M, Zamani-Ahmadmahmoodi R (2017) Assessment of water quality in Iran's Anzali Wetland,  
410 using qualitative indices from 1985, 2007, and 2014. Wetlands Ecol. Manage. 25(5):597-605.
- 411 Galloway LD, Burgess R (1962) Applied mycology and bacteriology. Loenard Hill, London. pp 54-  
412 57.
- 413 Gill PK, Arora DS, Chander M (2002) Biodecolourization of azo and triphenylmethane dyes by  
414 *Dichomitus squalens* and *Phlebia* spp. J. Ind. Microbiol. Biotechnol. 28(4):201-203.
- 415 Griffiths R, Robinson J, Jeffries P (2003) Susceptibility of frog (*Rana temporaria*) and toad (*Bufo*  
416 *bufo*) eggs to invasion by *Saprolegnia*. Amphibia-Reptilia 24(3):261-268.

- 417 Grinhut T, Salame TM, Chen Y, Hadar Y (2011) Involvement of ligninolytic enzymes and Fenton-  
418 like reaction in humic acid degradation by *Trametes* sp. Appl. Microbiol. Biotechnol.  
419 91:1131-1140.
- 420 Hall T, Biosciences I, Carlsbad C (2011) BioEdit: an important software for molecular biology. GEF  
421 Bull Biosci 2(1):60-61.
- 422 Hendrix JW (1964) Sterol induction of reproduction and stimulation of growth of *Pythium* and  
423 *Phytophthora*. Science 144(3621):1028-1029.
- 424 Hussein MA, Hassan WH, Mahmoud MA (2013) Pathogenicity of *Achlya proliferoides* and  
425 *Saprolegnia diclina* (Saprolegniaceae) associated with Saprolegniosis outbreaks in cultured  
426 Nile tilapia (*Oreochromis niloticus*). World J. Fish Mar. Sci. 5(2):188-193.
- 427 Hulvey JP, Padgett DE, Bailey JC (2007) Species boundaries within *Saprolegnia* (Saprolegniales,  
428 Oomycota) based on morphological and DNA sequence data. Mycologia 99(3):421-429.
- 429 Jo WS, Bae SH, Choi SY, Park SD, Yoo YB, Park SC (2010) Development of detection methods for  
430 cellulolytic activity of *Auricularia auricula-judae*. Mycobiology 38(1):74-77.
- 431 Johnson TW, Seymour RL, Padgett DE (2002) Biology and Systematics of the Saprolegniaceae.  
432 [http://dl.uncw.edu/digilib/biology/fungi/taxonomy\\_and\\_systematics/padgett\\_book/2002](http://dl.uncw.edu/digilib/biology/fungi/taxonomy_and_systematics/padgett_book/2002)  
433 [\[Accessed on October 10, 2019\]](#)
- 434 Junghanns C, Krauss G, Schlosser D (2008) Potential of aquatic fungi derived from diverse  
435 freshwater environments to decolourise synthetic azo and anthraquinone dyes. Bioresour.  
436 Technol. 99(5): 1225-1235.
- 437 Kannwischer ME, Mitchell DJ (1981) Relationships of number of spores of *Phytophthora parasitica*  
438 var. *nicotianae* to infection and mortality of tobacco. Phytophthology 71:69-73.
- 439 Khatib S, Khodaparast H (2010) Survey of Gram-negative bacteria contamination in some parts of  
440 Bandar Anzali wetland. J Mar Sci Tech 10(3):57-69.
- 441 Kiziewicz B (2005) Aquatic Fungi Growing on Seeds of Plants in Various Types of Water Bodies of  
442 Podlasie Province. Pol. J. Environ. Stud. 14(1):49-55.



- 443 Kiziewicz B, Kurzatowska A (2004) Aquatic fungi and fungus-like organisms isolated from surface  
444 waters situated near Białystok in Podlasie Province of Poland using the insect *Notonecta*  
445 *glauca* as bait. *Mycologia Balc.* 1(2–3):117-123.
- 446 Kiziewicz B, Nalepa TF (2008) Some Fungi and Water Molds in Waters of Lake Michigan with  
447 Emphasis on Those Associated with the Benthic Amphipod *Diporeia* spp. *J. Great Lakes Res.*  
448 34(4):774-780.
- 449 Kumar S, Stecher G, Tamura K (2016) MEGA7: molecular evolutionary genetics analysis version 7.0  
450 for bigger datasets. *Mol. Biol. Evol.* 33(7):1870-1874.
- 451 Lennon JT, Hamilton SK, Muscarella ME, Grandy AS, Wickings K, Jones SE (2013) A source of  
452 terrestrial organic carbon to investigate the browning of aquatic ecosystems. *PLoS One* 8:  
453 e75771.
- 454 Liu C, Volz PA (1976) On the ecology of the Saprolegniaceae. *Phytopathologia* 34(3):209-230.
- 455 Marano AV, Barrera MD, Steciow MM, Gleason FH, Pires-Zottarelli CL, Donadelli JL (2011)  
456 Diversity of zoosporic true fungi and heterotrophic straminipiles in Las Cañas stream (Buenos  
457 Aires, Argentina): assemblages colonizing baits. *Fundamental and Applied*  
458 *Limnology/Archiv für Hydrobiologie* 178(3):203-218.
- 459 Masigol H, Khodaparast SA, Woodhouse JN, Rojas-Jimenes K, Fonvielle J, Rezakhani F,  
460 Mostowfizadeh-Ghalamfarsa R, Neubauer D, Goldhammer T, Grossart H-P (2019) The  
461 contrasting roles of aquatic fungi and oomycetes in the degradation and transformation of  
462 polymeric organic matter. *Limnol. Oceanogr.* 64(6):2662-2678.
- 463 Masigol H, Khodaparast SA, Mostowfizadeh-Ghalamfarsa R, Rojas-Jimenes K, Grossart H-P (2019)  
464 Notes on *Dictyuchus* species (Stramenopila, Oomycetes) from Anzali lagoon, Iran. *Mycol.*  
465 *Iran.* 5(2):79-89.
- 466 Meinelt T, Paul A, Phan TM, Zwirnmann E, Krüger A, Wienke A, Steinberg CE (2007) Reduction in  
467 vegetative growth of the water mold *Saprolegnia parasitica* (Coker) by humic substance of  
468 different qualities. *Aquat. Toxicol.* 83(2):93-103.
- 469 Middleton JT (1943) The taxonomy, host range, and geographical distribution of the genus *Pythium*.  
470 *Mem. Torrey Bot. Club* 20:1-171.

- 471 Molloy DP, Glockling SL, Siegfried CA, Gordon W, Beakes GW, James TY, Mastitsky SE, Wurdak  
472 E, Giamberini L, Gaylo MJ, Michael J, Nemeth MJ (2014) *Aquastella* gen. nov.: a new genus  
473 of saprolegniaceous oomycete rotifer parasites related to *Aphanomyces*, with unique  
474 sporangial outgrowths. Fungal Biol. 118:544-558.
- 475 Montero-Pau J, Gómez A, Muñoz J (2008) Application of an inexpensive and high-throughput  
476 genomic DNA extraction method for the molecular ecology of zooplanktonic diapausing  
477 eggs. Limnol. Oceanogr.: Methods 6(6):218-222.
- 478 Moreau F, Moreau M (1936a) Action des sucres les Saprolegniees. Comptes rendus hebdomadaires  
479 des séances de l'Académie 202:1086-1087.
- 480 Moreau F, Moreau M (1936b) Action de la glycerine sur les Saprolegniees. Comptes rendus  
481 hebdomadaires des séances de l'Académie 202:152-154.
- 482 Moreira MT, Mielgo I, Feijoo G, Lema JM (2000) Evaluation of different fungal isolates in the  
483 decolourisation of synthetic dyes. Biotechnol. Lett. 22:1499-503.
- 484 Murthy N, Bleakley B (2012) Simplified method of preparing colloidal chitin used for screening of  
485 chitinase-producing microorganisms. The Internet Journal of Microbiology 10(2):p.e2bc3.
- 486 Mousavi HAE, Soltani M, Khosravi A, Mood SM, Hosseinifard M (2009) Isolation and  
487 characterization of Saprolegniaceae from rainbow trout (*Oncorhynchus mykiss*) eggs in Iran.  
488 J. Fish. Aquat. Sci. 4(6):330-333.
- 489 Nascimento CA, Gomes EPC, Pires-Zottarelli CLA (2011) Occurrence and distribution of zoosporic  
490 organisms in water bodies from Brazilian Cerrado. Mycologia 103:261-272.
- 491 Novotny C, Rawal B, Bhatt M, Patel M, Sasek V, Molitoris HP (2001) Capacity of *Irpex lacteus* and  
492 *Pleurotus ostreatus* for decolorization of chemically different dyes. J. Biotechnol. 89:113-  
493 122.
- 494 Nyhlen L, Unestam T (1975) Ultrastructure of the penetration of the crayfish integument by the  
495 fungal parasite, *Aphanomyces astaci*, Oomycetes. J. Invertebr. Pathol. 26:353-366.
- 496 Paliwal PC, Sati SC (2009) Distribution of aquatic fungi in relation to physicochemical factors of  
497 Kosi river in Kumaun Himalaya. Nature and Science 7(3):70-74.

- 498 Pointing, S.B (1999) Qualitative methods for the determination of lignocellulolytic enzyme  
499 production by tropical fungi. *Fungal Divers.* 2:17-33.
- 500 Robideau GP, deCock AW, Coffey MD, Voglmayr H, Brouwer H, Bala K, Chitty DW, Désaulniers  
501 N, Eggertson QA, Gachon CM (2011) DNA barcoding of oomycetes with cytochrome c  
502 oxidase subunit I and internal transcribed spacer. *Mol. Ecol. Resour.* 11(6):1002-1011.
- 503 Rocha SC, Lopez-Lastra CC, Marano AV, de Souza JI, Rueda-Páramo ME, Pires-Zottarelli CL  
504 (2018) New phylogenetic insights into Saprolegniales (Oomycota, Straminipila) based upon  
505 studies of specimens isolated from Brazil and Argentina. *Mycol. Prog.* 1:17(6):691-700.
- 506 Rojas-Jimenez K, Fonvielle JA, Ma H, Grossart HP (2017) Transformation of humic substances by  
507 the freshwater Ascomycete *Cladosporium* sp. *Limnol. Oceanogr.* 62(5):1955-1962.
- 508 Romansic JM, Diez KA, Higashi EM, Johnson JE, Blaustein AR (2009) Effects of the pathogenic  
509 water mold *Saprolegnia ferax* on survival of amphibian larvae. *Dis. Aquat. Org.* 83(3):187-  
510 193.
- 511 Sandoval-Sierra JV, Diéguez-Uribeondo J (2015) A comprehensive protocol for improving the  
512 description of Saprolegniales (Oomycota): two practical examples (*Saprolegnia aenigmatica*  
513 sp. nov. and *Saprolegnia racemosa* sp. nov.). *PloS one* 10(7):e0132999.
- 514 Sandoval-Sierra JV, Martín MP, Diéguez-Uribeondo J (2014) Species identification in the genus  
515 *Saprolegnia* (Oomycetes): defining DNA-based molecular operational taxonomic units.  
516 *Fungal Biol.* 118(7):559-578.
- 517 Satour MM (1967) Rape seed extract agar: a new medium for production and detection of oospores of  
518 heterothallic species of *Phytophthora*. *Mycologia* 59(1):161-166.
- 519 Savage EJ, Clayton CW, Hunter JH, Brenneman JA, Laviola C, Gallegly ME (1968) Homothallism,  
520 heterothallism, and interspecific hybridization in the genus *Phytophthora*. *Phytopathology*  
521 58(7):1004-1021.
- 522 Seymour R, Fuller MS (1987) Collection and isolation of water molds (Saprolegniaceae) from water  
523 and soil. In: Fuller MS, Jaworski A (eds) *Zoosporic fungi in teaching and research.*  
524 Southeastern Publishing, Athens, pp 125-127.
- 525 Seymour RL (1970) The genus *Saprolegnia*. *Nova Hedwigia* 19:1-124.

- 526 Simonis JL, Raja HA, Shearer CA (2008) Extracellular enzymes and soft rot decay: Are ascomycetes  
527 important degraders in fresh water. *Fungal Divers.* 31(1):135-146.
- 528 Solomon CT, Jones SE, Weidel BC, Buffam I, Fork ML, Karlsson J, Larsen S, Lennon JT, Read JT,  
529 Sadro S, Saros JE (2015) Ecosystem consequences of changing inputs of terrestrial dissolved  
530 organic matter to lakes: current knowledge and future challenges. *Ecosystems* 18(3):376-389.
- 531 Steciow MM, Lara H, Paul C, Pillonel A, Belbahri L (2014) Multiple barcode assessment within the  
532 *Saprolegnia-Achlya* clade (*Saprolegniales*, *Oomycota*, *Straminipila*) brings order in a  
533 neglected group of pathogens. *IMA Fungus* 5:439-448.
- 534 Steinberg CE, Paul A, Pflugmacher S, Meinelt T, Klöcking R, Wiegand C (2003) Pure humic  
535 substances have the potential to act as xenobiotic chemicals-A review. *Fresenius Environ.*  
536 *Bull.* 12(5):391-401.
- 537 Swamy J, Ramsay JA (1999) Effects of glucose and  $\text{NH}_4^+$  concentrations on sequential dye  
538 decoloration by *Trametes versicolor*. *Enzyme Microb. Technol.* 25:278-84.
- 539 Teather RM, Wood PJ (1982) Use of Congo red-polysaccharide interactions in enumeration and  
540 characterization of cellulolytic bacteria from the bovine rumen. *Appl. Environ. Microbiol.*  
541 43(4):777-780.
- 542 Thompson JD, Higgins DG, Gibson TJ (1994) CLUSTAL W: improving the sensitivity of progressive  
543 multiple sequence alignment through sequence weighting, position-specific gap penalties and  
544 weight matrix choice. *Nucleic Acids Res.* 22:4673-80.
- 545 Thompstone A, Dix NJ (1985) Cellulase activity in the Saprolegniaceae. *Trans. Br. Mycol. Soc.*  
546 85(2):361-366.
- 547 Tranvik LJ, Cole JJ, Prairie YT (2018) The study of carbon in inland waters—from isolated  
548 ecosystems to players in the global carbon cycle. *Limnol. Oceanogr. Lett.* 3(3):41-48.
- 549 Unestam T (1966) Chitinolytic, Cellulolytic, and Pectinolytic Activity in vitro of Some Parasitic and  
550 Saprophytic Oomycetes. *Physiol. Plant.* 19(1):15-30.
- 551 Van Den Berg AH, McLaggan D, Dieguez-Uribeondo J, Van West P (2013) The impact of the water  
552 moulds *Saprolegnia diclina* and *Saprolegnia parasitica* on natural ecosystems and the  
553 aquaculture industry. *Fungal Biol. Rev.* 27(2):33-42.

554 Van West P (2006) *Saprolegnia parasitica*, an oomycete pathogen with a fishy appetite: new  
555 challenges for an old problem. *Mycologist* 20(3):99-104.

556 White TJ, Bruns TD, Lee SB, Taylor JW (1990) Amplification and direct sequencing of fungal  
557 ribosomal RNA genes for phylogenetics. In: Innis MA, Gelfand DH, Sininsky JJ, White TJ  
558 (eds) *PCR Protocols: A Guide to Methods and Applications*. Academic Press, San Diego, CA,  
559 USA. pp 315-322.

560 Wood TM, Bhat KM (1988) Methods for measuring cellulase activities. *Methods Enzymol* 160:87-  
561 112.

562 Yoon JH, Park JE, Suh DY, Hong SB, Ko SJ, Kim SH (2007) Comparison of dyes for easy detection  
563 of extracellular cellulases in fungi. *Mycobiology* 35(1):21-24.

564 Zahmatkesh M, Spanjers HLFM, Toran MJ, Blázquez P, van Lier JB (2016) Bioremoval of humic  
565 acid from water by white rot fungi: exploring the removal mechanisms. *AMB Express*  
566 6(1):118.

567

568

569

570

571

572

573

574

575

576

577

578

579

580

581

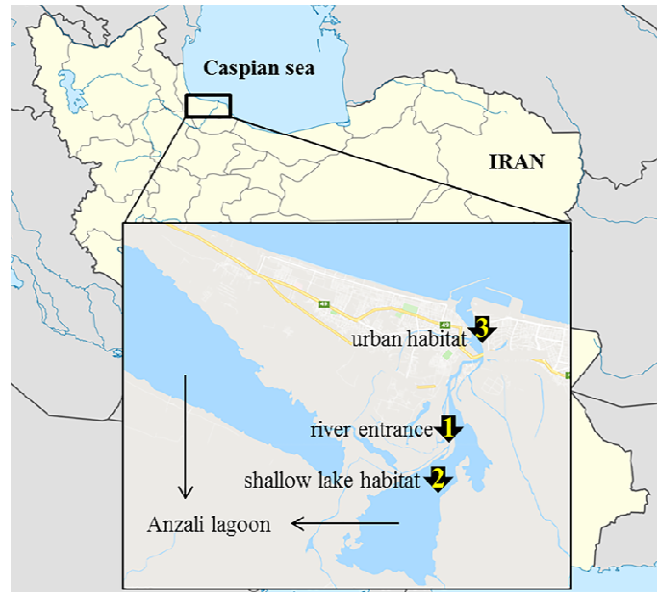

582

583 **Fig.1** Sampling locations (1: river entrance, 2: shallow lake habitat and 3: urban habitat) for isolation  
584 of *Saprolegniales* taxa from Anzali lagoon, Iran during 2017

585

586

587

588

589

590

591

592

593

594

595

596

597

598

599

600

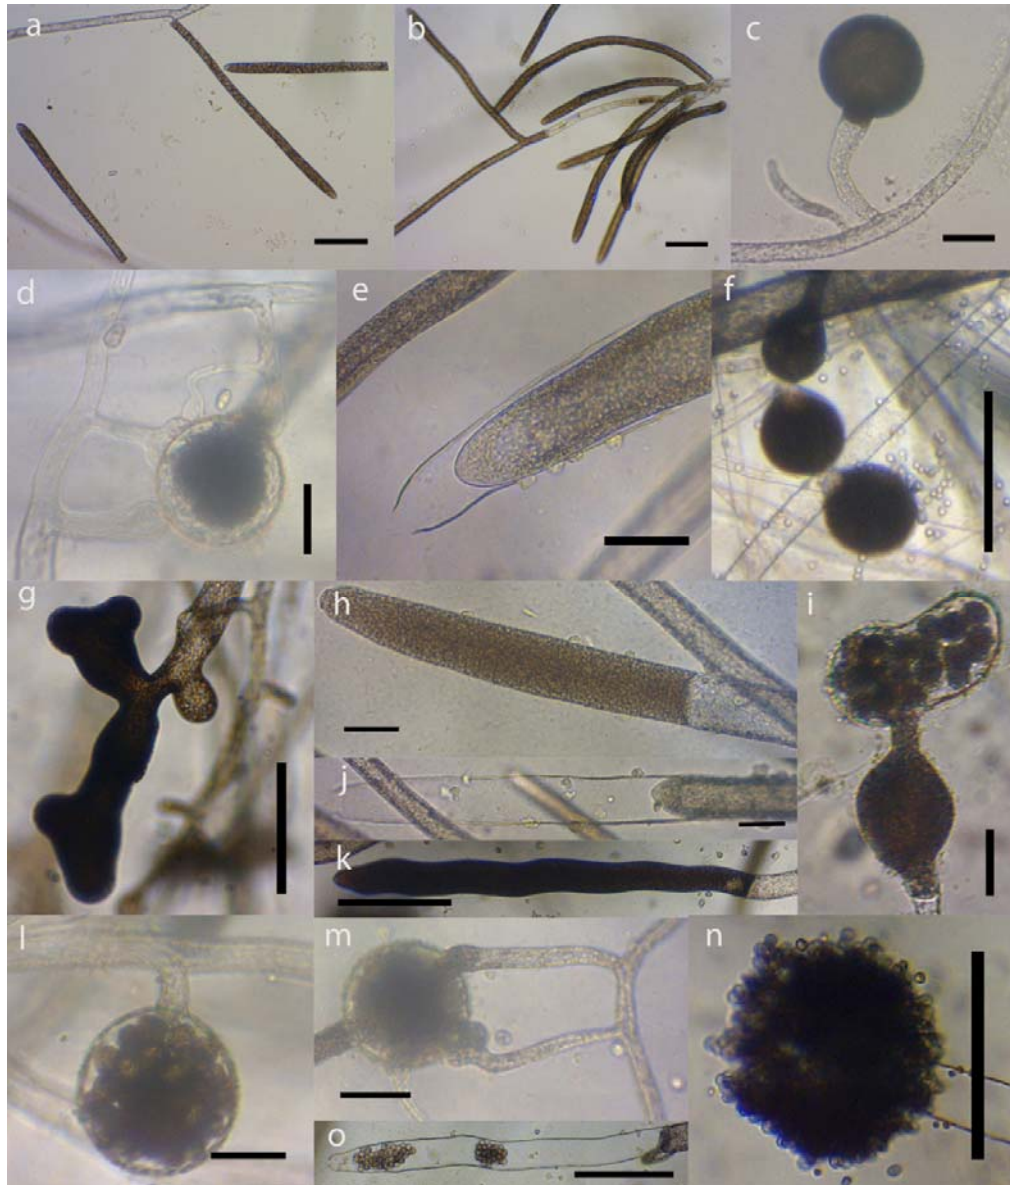

601

602 **Fig. 2** General morphological characteristics of selected isolates used in this study observed in water  
603 culture at room temperature; (a-c) fusiform straight and sporangia (a), cymose fashion renewal of  
604 sporangia (b) and terminal immature oogonia with stalk (c) of *Saprolegnia anisospora*; (d-f) diclinous  
605 and androgynous antheridia (d), internal renewal of sporangia and catenulate spherical gemma(f) of *S.*  
606 *diclina*; (g-i) an extremely irregular gemma (g), cylindrical sporangia (h) and an oogonium with  
607 irregular shape (i) of *S. ferax*; (j and l-m) internal renewal of sporangia (j), lateral oogonia and short  
608 stalk (l), diclinous antheridia (m) of *S. parasitica*, (k) sporangia, (o) empty sporangia and (n) spore  
609 clump of *Achlyaspp.* (bar=50  $\mu\text{m}$ , except for k, n and o which are 200  $\mu\text{m}$ )



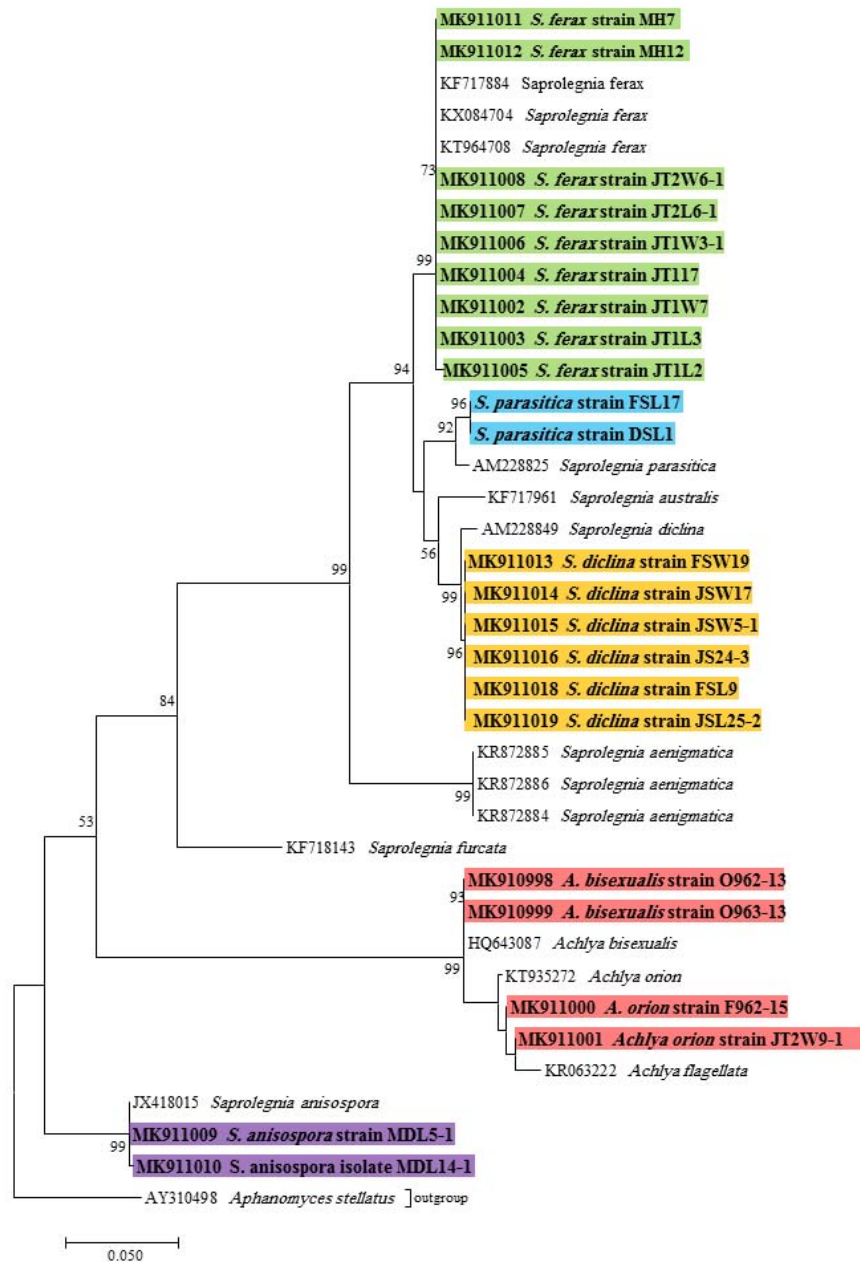

610

611 **Fig. 3** Phylogenetic tree of the family Saprolegniaceae (*Saprolegniales*, *Oomycota*). The analysis was  
 612 performed based on alignment of the ITS1-5.8S-ITS2 region (694bp) using the maximum likelihood  
 613 method from isolates in this study (bold and colored) and valid sequences from GenBank. Numbers  
 614 next to the branches shows bootstraps values  $\geq 50\%$ . *Aphanomyces stellatus* was considered as  
 615 outgroup



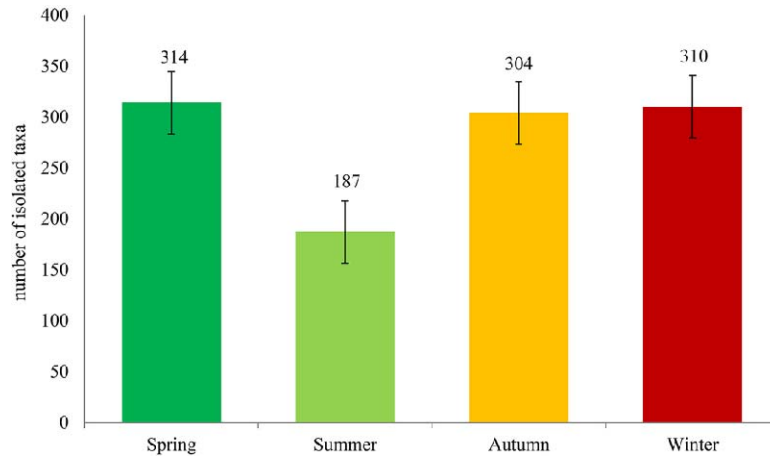

616

617 **Fig. 4** Seasonal occurrence of *Saprolegniales* isolates reported by various researchers obtained from  
618 25 case studies (1958-2015)

619

620

621

622

623

624

625

626

627

628

629

630

631

633 **Table 1** *Saprolegniales* isolates obtained from three coordinates Anzali lagoon (Rasht County, Iran)  
634 during 2017 and their GenBank accession numbers (ITS region).

| <b>Species</b>       | <b>Isolates</b> | <b>Isolation time</b> | <b>Acc. numbers</b> |
|----------------------|-----------------|-----------------------|---------------------|
| <i>A. bisexualis</i> | O962-13         | Dec.                  | MK910998            |
|                      | O963-13         | Sep.                  | MK910999            |
| <i>A. orion</i>      | F962-15         | Feb.                  | MK911000            |
| <i>S. anisospora</i> | MDL5-1          | May                   | MK911009            |
|                      | MDL14-1         | Aug.                  | MK911010            |
| <i>S. diclina</i>    | FSW19           | Jan.                  | MK911013            |
|                      | JSW17           | Jun.                  | MK911014            |
|                      | JSW5-1          | Apr.                  | MK911015            |
|                      | JSL24-3         | Aug.                  | MK911016            |
|                      | FSL9            | May                   | MK911018            |
|                      | JSL25-2         | Jun.                  | MK911019            |
|                      | JT1L2           | Jul.                  | MK911005            |
|                      | JT1W3-1         | Dec.                  | MK911006            |
|                      | JT1L3           | Apr.                  | MK911003            |
|                      | JT1W7           | Jul.                  | MK911002            |
| <i>S. ferax</i>      | JT117           | Feb.                  | MK911004            |
|                      | JT2L6-1         | Sep.                  | MK911007            |
|                      | JT2W6-1         | Jan.                  | MK911008            |
|                      | MH7             | Oct.                  | MK911011            |
|                      | MH12            | Mar.                  | MK911012            |
| <i>S. parasitica</i> | FSL17           | Nov.                  | MK911017            |
|                      | DSL1            | Oct.                  | MK911020            |
| <i>Achlya</i> sp.    | JT2W9-1         | Mar.                  | MK911001            |

635

636

637 **Table 2** Number and percentage of colonized hemp seed halves per Petri dish isolated from three  
 638 sampling sites in Anzali lagoon, Iran throughout 2017.

| averaged number of colonized hemp seed halves per Petri dish <sup>a</sup> |                  |                 |    |    |       |            |    |    |      |            |    |    |       |
|---------------------------------------------------------------------------|------------------|-----------------|----|----|-------|------------|----|----|------|------------|----|----|-------|
|                                                                           |                  | Location 1      |    |    |       | Location 2 |    |    |      | Location 3 |    |    |       |
| Seasons                                                                   | Months           | R1 <sup>b</sup> | R2 | R3 | %     | R1         | R2 | R3 | %    | R1         | R2 | R3 | %     |
| <b>Spring</b>                                                             | Mar. 21- Apr. 20 | 17 <sup>c</sup> | 18 | 19 | 92.5  | 18         | 17 | 19 | 90.0 | 16         | 17 | 17 | 85.0  |
|                                                                           | Apr. 21- May 21  | 13              | 13 | 13 | 65.0  | 13         | 13 | 11 | 60.0 | 12         | 13 | 14 | 67.5  |
|                                                                           | May 22- Jun. 21  | 11              | 12 | 11 | 57.5  | 12         | 12 | 13 | 62.5 | 11         | 10 | 9  | 47.5  |
| <b>Summer</b>                                                             | Jun. 22- Jul. 22 | 10              | 9  | 9  | 45.0  | 13         | 14 | 14 | 70.0 | 13         | 14 | 13 | 67.5  |
|                                                                           | Jul. 23- Aug. 22 | 5               | 4  | 5  | 22.5  | 4          | 3  | 4  | 17.5 | 5          | 5  | 6  | 27.5  |
|                                                                           | Aug. 23- Sep. 22 | 9               | 9  | 9  | 45.0  | 12         | 14 | 12 | 65.0 | 13         | 14 | 14 | 70.0  |
| <b>Autumn</b>                                                             | Sep. 23- Oct. 22 | 16              | 17 | 17 | 85.0  | 18         | 18 | 17 | 87.5 | 17         | 19 | 18 | 92.5  |
|                                                                           | Oct. 23- Nov. 21 | 17              | 18 | 17 | 87.5  | 17         | 16 | 16 | 80.0 | 19         | 20 | 20 | 100.0 |
|                                                                           | Nov. 22- Dec. 21 | 19              | 20 | 20 | 100.0 | 19         | 19 | 20 | 97.5 | 17         | 18 | 19 | 92.5  |
| <b>Winter</b>                                                             | Dec. 22- Jan. 20 | 16              | 15 | 15 | 75.0  | 15         | 14 | 13 | 67.5 | 17         | 19 | 19 | 95.0  |
|                                                                           | Jan. 21- Feb. 19 | 17              | 17 | 17 | 85.0  | 16         | 16 | 15 | 77.5 | 18         | 17 | 19 | 90.0  |
|                                                                           | Feb. 20- Mar. 20 | 18              | 19 | 20 | 97.5  | 17         | 17 | 16 | 82.5 | 20         | 19 | 18 | 92.5  |

639 <sup>a</sup> Each Petri dish contains 20 hemp seed halves. <sup>b</sup>Replications <sup>c</sup>Averaged number of colonized hemp seed halves  
 640 from 10 Petri dishes.

641

642

643

644

645

646

647

648

649

650 **Table 3** Results of experimental screening for lignolytic, cellulolytic, and chitinolytic activities of all  
 651 *Saprolegniales* isolates isolated from Anzali lagoon, Rasht, Iran.

| Isolates | Taxa                 | AVL <sup>a</sup> | CMC <sup>a</sup> | DCB <sup>a</sup> | ABTS <sup>b</sup> | BG <sup>b</sup> | CR <sup>b</sup> | PhR <sup>b</sup> | PR <sup>b</sup> | RBBR <sup>b</sup> | TB <sup>b</sup> | CC <sup>c</sup> |
|----------|----------------------|------------------|------------------|------------------|-------------------|-----------------|-----------------|------------------|-----------------|-------------------|-----------------|-----------------|
| O962-13  | <i>A. bisexualis</i> |                  | Green            |                  |                   |                 |                 | Red              |                 |                   |                 | Green           |
| O963-13  | <i>A. bisexualis</i> | Pale Green       | Green            |                  |                   |                 |                 | Red              |                 |                   |                 | Green           |
| F962-15  | <i>A. orion</i>      |                  |                  |                  |                   |                 |                 | Red              |                 |                   |                 | Green           |
| MDL5-1   | <i>S. anisopora</i>  | Dark Green       | Green            |                  |                   | Red             |                 | Red              |                 | Red               |                 |                 |
| MDL14-1  | <i>S. anisopora</i>  | Dark Green       | Green            |                  |                   | Red             |                 | Red              |                 | Red               |                 |                 |
| FSW19    | <i>S. diclina</i>    |                  |                  |                  |                   |                 | Pale Red        | Red              |                 |                   |                 |                 |
| JSW17    | <i>S. diclina</i>    | Pale Green       |                  | Green            |                   |                 |                 | Red              |                 |                   |                 | Green           |
| JSW5-1   | <i>S. diclina</i>    |                  | Green            |                  |                   |                 |                 | Red              | Red             |                   |                 |                 |
| JSL24-3  | <i>S. diclina</i>    |                  | Green            | Green            |                   |                 |                 | Red              |                 |                   |                 |                 |
| FSL9     | <i>S. diclina</i>    | Dark Green       | Green            |                  |                   | Red             |                 | Red              |                 | Red               |                 | Green           |
| JSL25-2  | <i>S. diclina</i>    |                  | Green            |                  |                   |                 |                 | Red              |                 |                   | Red             |                 |
| JT1L2    | <i>S. diclina</i>    |                  |                  |                  |                   | Pale Green      |                 | Red              |                 |                   |                 | Green           |
| JT1W3-1  | <i>S. diclina</i>    |                  |                  |                  |                   | Green           |                 | Red              |                 |                   |                 | Green           |
| JT1L3    | <i>S. diclina</i>    |                  |                  |                  |                   |                 |                 | Red              |                 |                   |                 | Green           |
| JT1W7    | <i>S. diclina</i>    |                  |                  |                  |                   | Pale Green      |                 | Red              |                 |                   | Green           | Green           |
| JT117    | <i>S. ferax</i>      |                  |                  |                  |                   | Green           |                 | Red              |                 |                   |                 | Green           |
| JT2L6-1  | <i>S. ferax</i>      |                  |                  |                  |                   |                 |                 | Red              |                 |                   |                 | Green           |
| JT2W6-1  | <i>S. ferax</i>      | Pale Green       |                  | Green            |                   | Red             |                 | Red              |                 |                   |                 |                 |
| MH7      | <i>S. ferax</i>      |                  |                  |                  |                   | Green           |                 | Red              |                 |                   |                 | Green           |
| MH12     | <i>S. ferax</i>      | Green            | Green            | Green            |                   | Green           |                 | Red              |                 |                   | Green           | Green           |
| FSL17    | <i>S. parasitica</i> | Green            | Green            | Green            |                   | Red             |                 | Red              |                 | Red               |                 | Red             |
| DSL1     | <i>S. parasitica</i> |                  |                  | Green            |                   | Green           |                 | Red              |                 |                   |                 |                 |
| JT2W9-1  | <i>Achlya sp.</i>    | Green            |                  | Green            |                   | Green           |                 | Red              |                 |                   |                 | Green           |

652  
 653 <sup>a</sup>Three carbon sources as indicators of cellulolytic activities, carboxymethylcellulose (CMC), Avicel  
 654 (AVL), D-cellobiose (DCB), as indicators of Endo-1,4-β-glucanase, Cellobiohydrolase and β-  
 655 Glucosidase  
 656 <sup>b</sup>Dyes as indicators of lignolytic activities, 2,20-Azino-bis 3-ethylbenzothiazoline-6-sulfonic acid  
 657 diammonium salt (ABTS) (as specific indicator of Laccase activity), Bromocresol Green (BG), Congo  
 658 Red (CR), malachite green (MG), Phenol Red (PhR), PolyR-478 (PR, Remazol Brilliant Blue (RBBR),  
 659 and (8) Toluidine Blue (TB)  
 660 <sup>c</sup>Colloidal chitin (CC) as indicator of chitinolytic activities  
 661 White color = no activity, pale green = weak, green = medium, and dark green = strong activity, red =  
 662 no growth, pale red = adsorption
